# Supplementary figures and images for: Polarisation-independent ultrafast laser selective etching processing in fused silica
Source: Royal Society of Chemistry journal article supplement (doi:10.1039/d3lc00052d), 2023-01-01

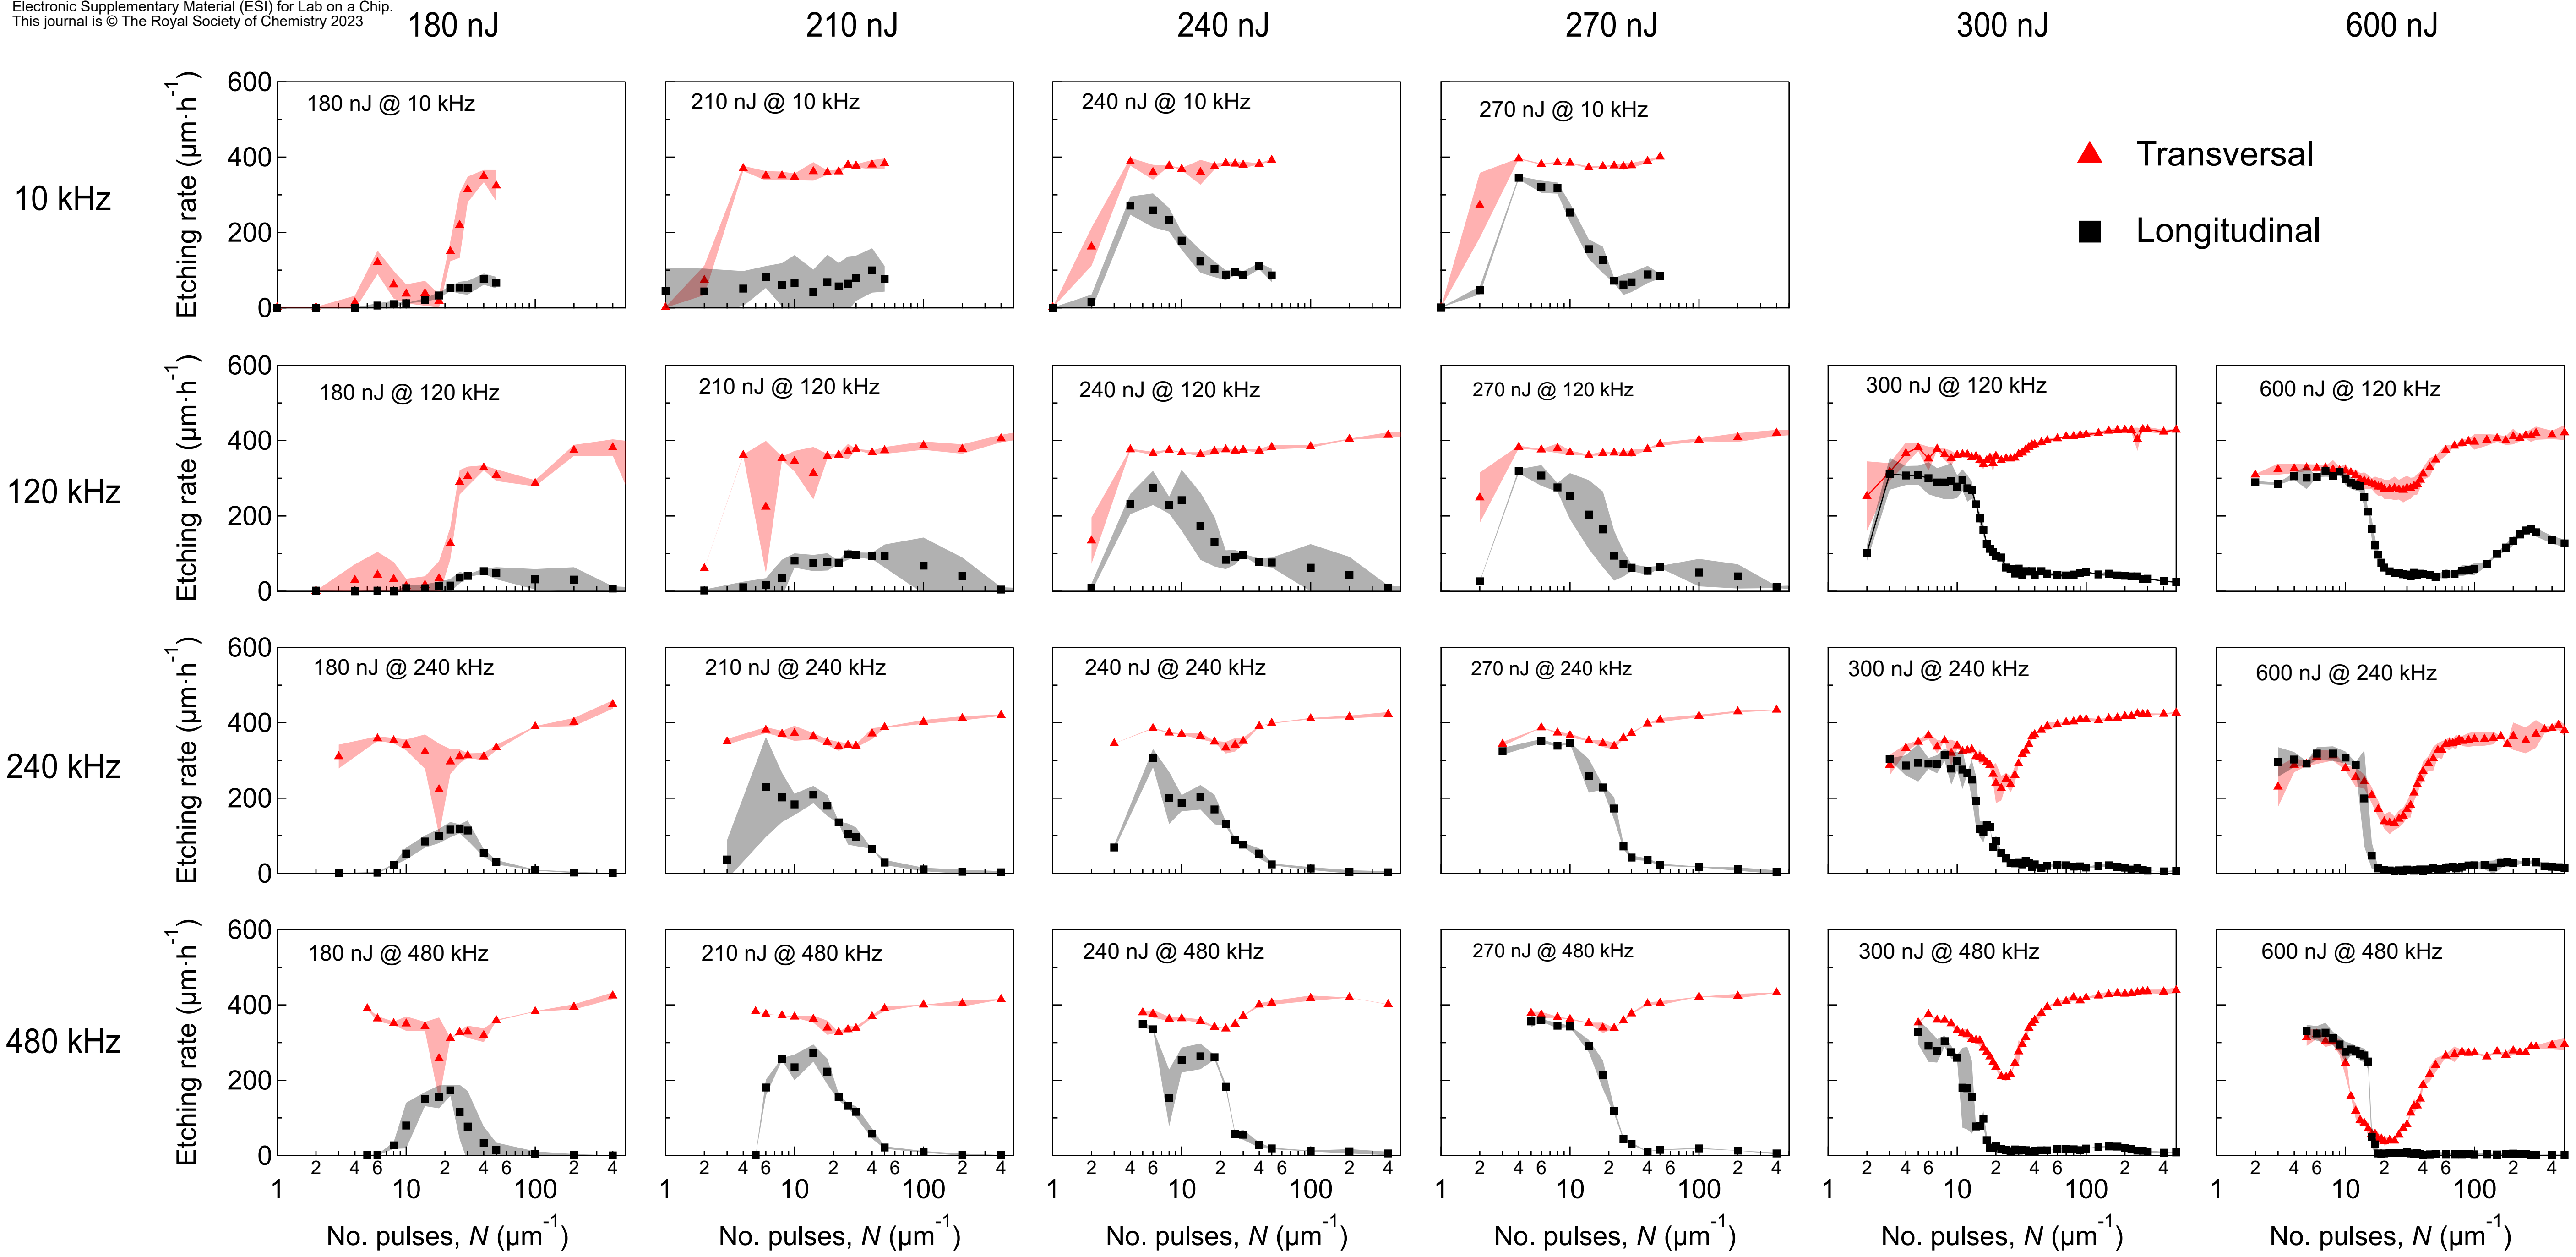

Supplement: d3lc00052d1.pdf [file d3lc00052d1.pdf]

△ □ KOH  
▲ ■ NaOH

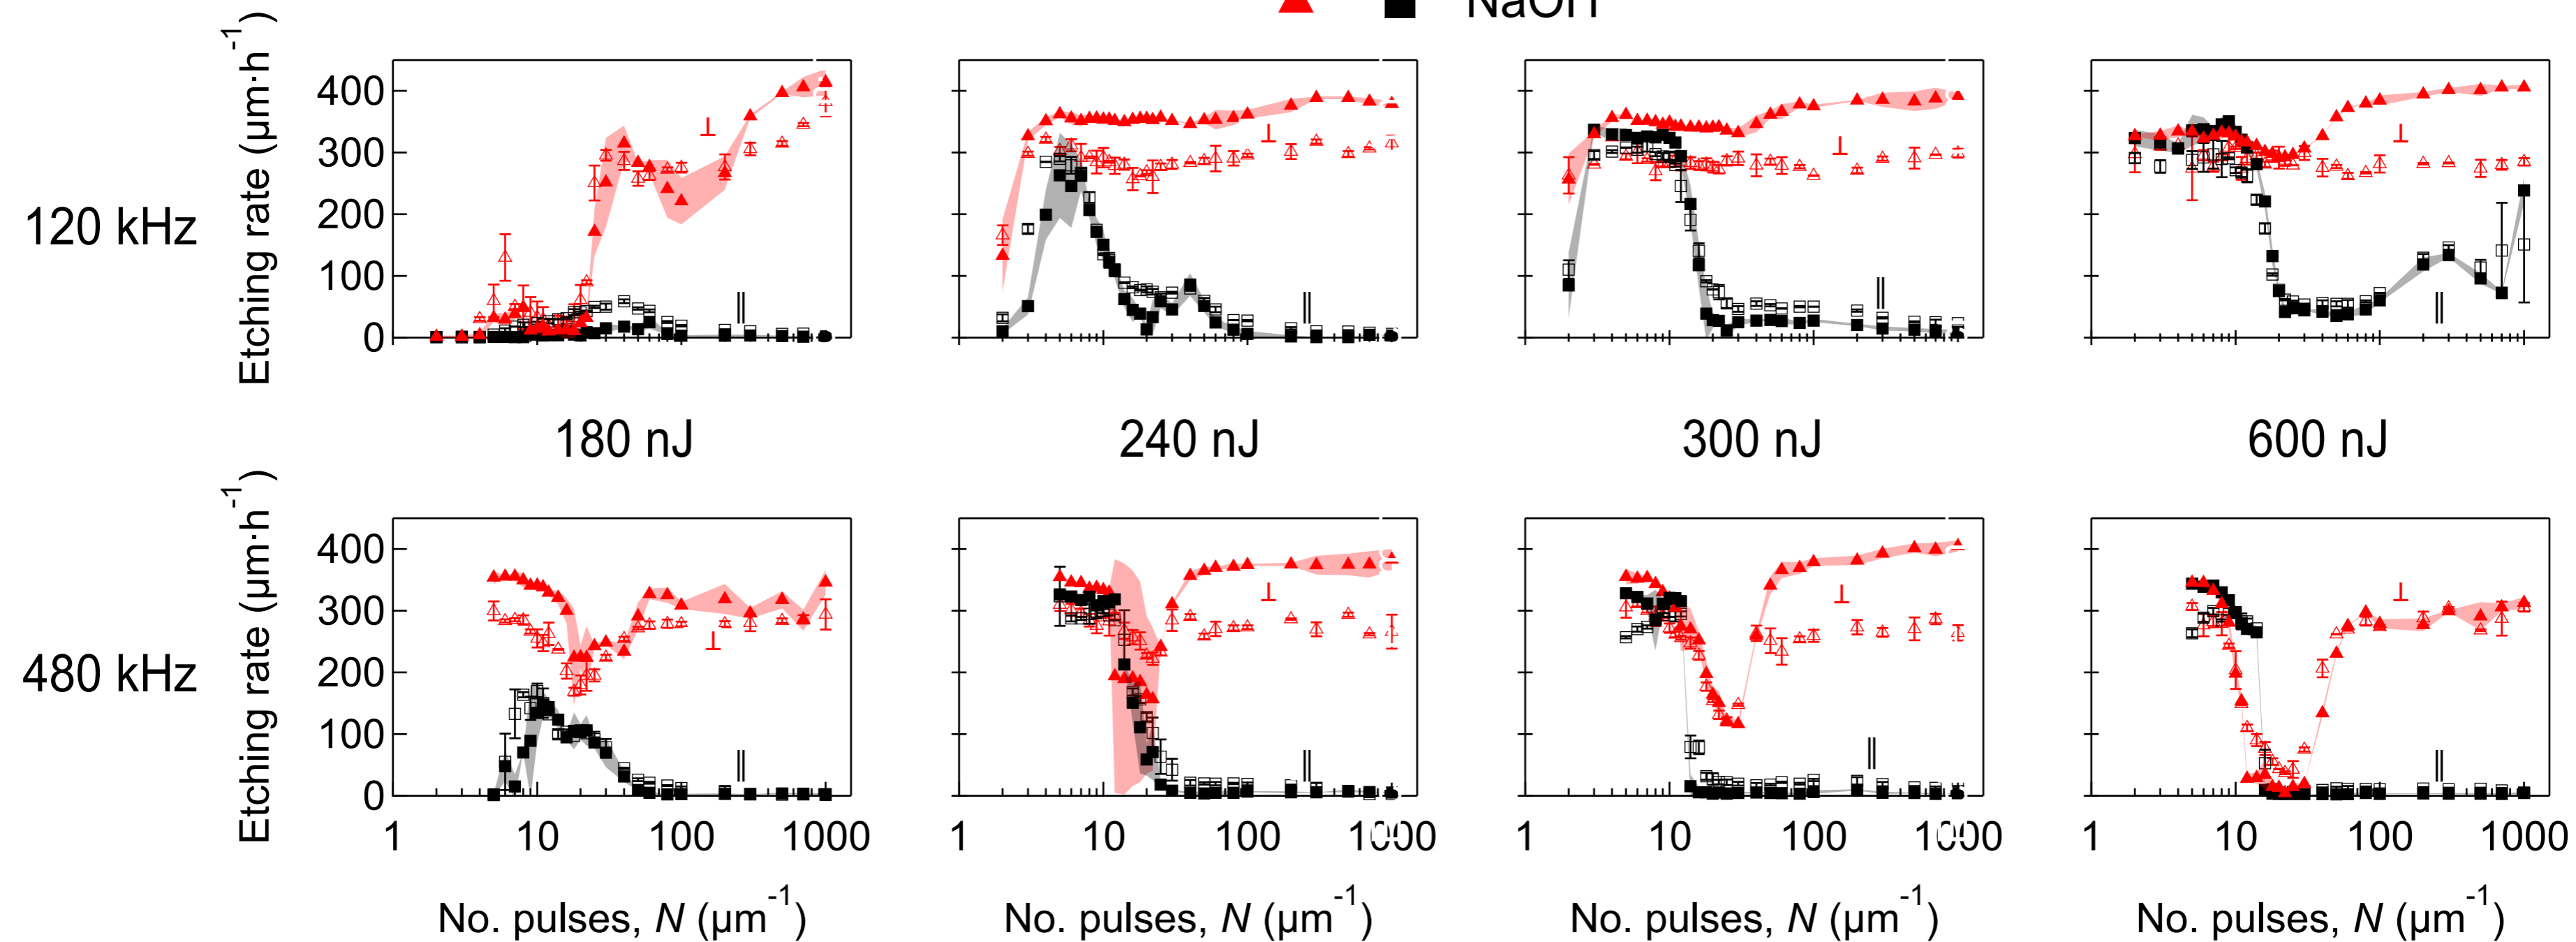

Supplement: d3lc00052d2.pdf [file d3lc00052d2.pdf]

$N=5 \mu\text{m}^{-1}$

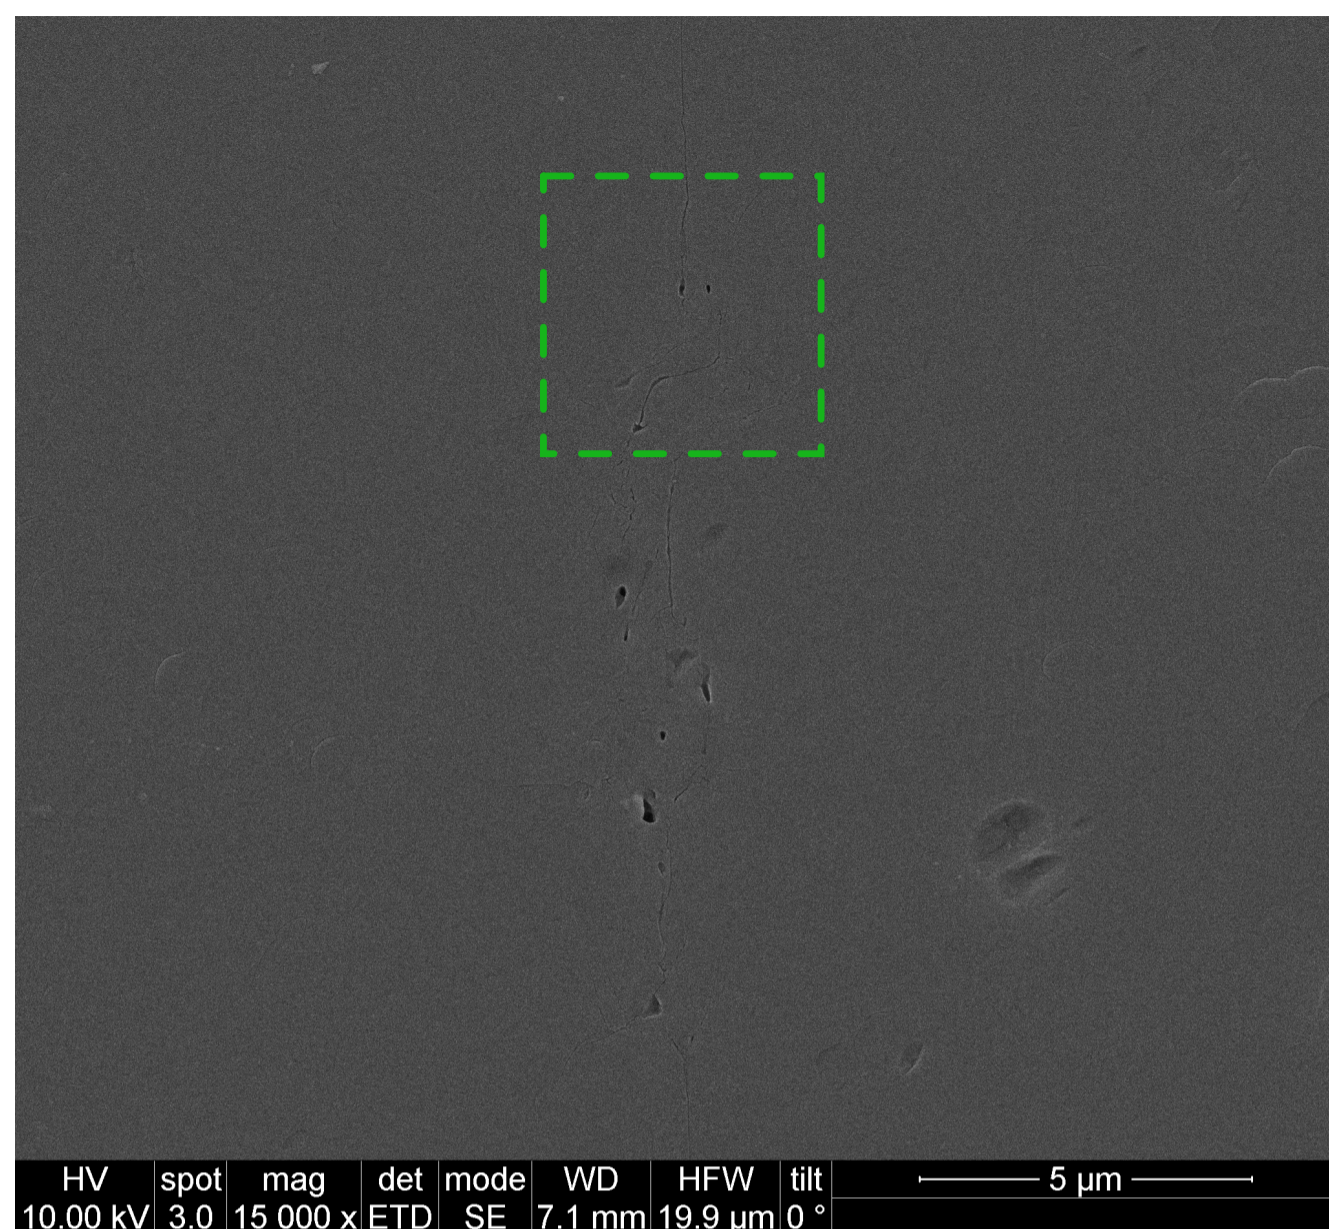

$N=20 \mu\text{m}^{-1}$

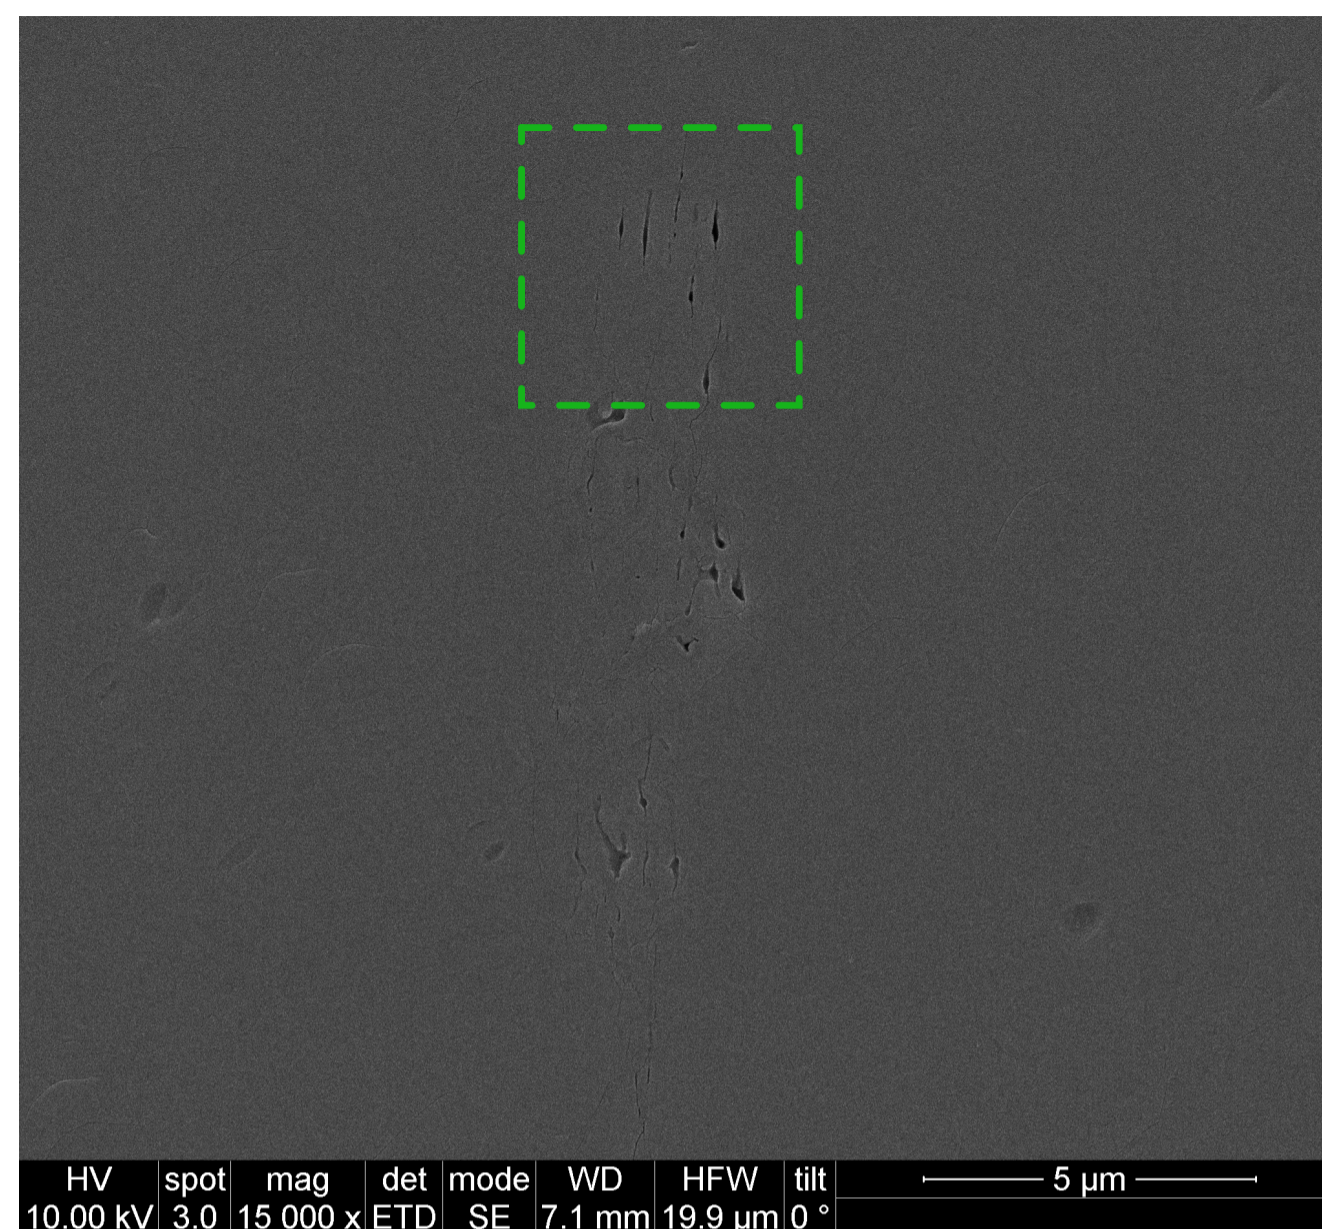

$N=100 \mu\text{m}^{-1}$

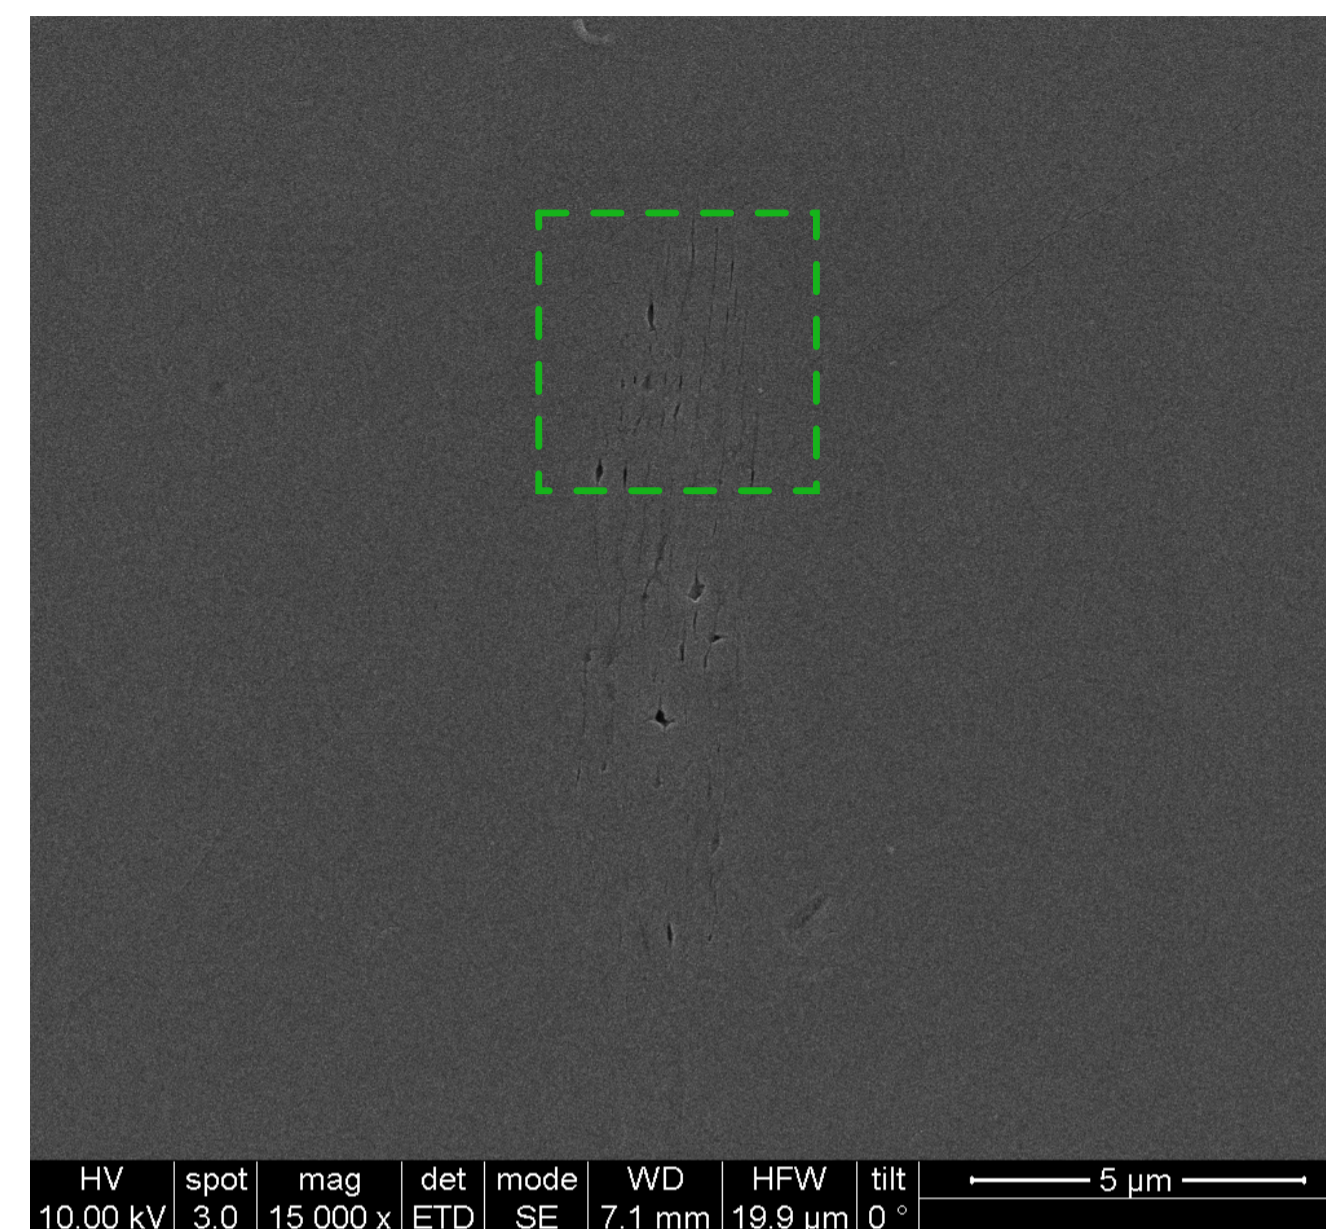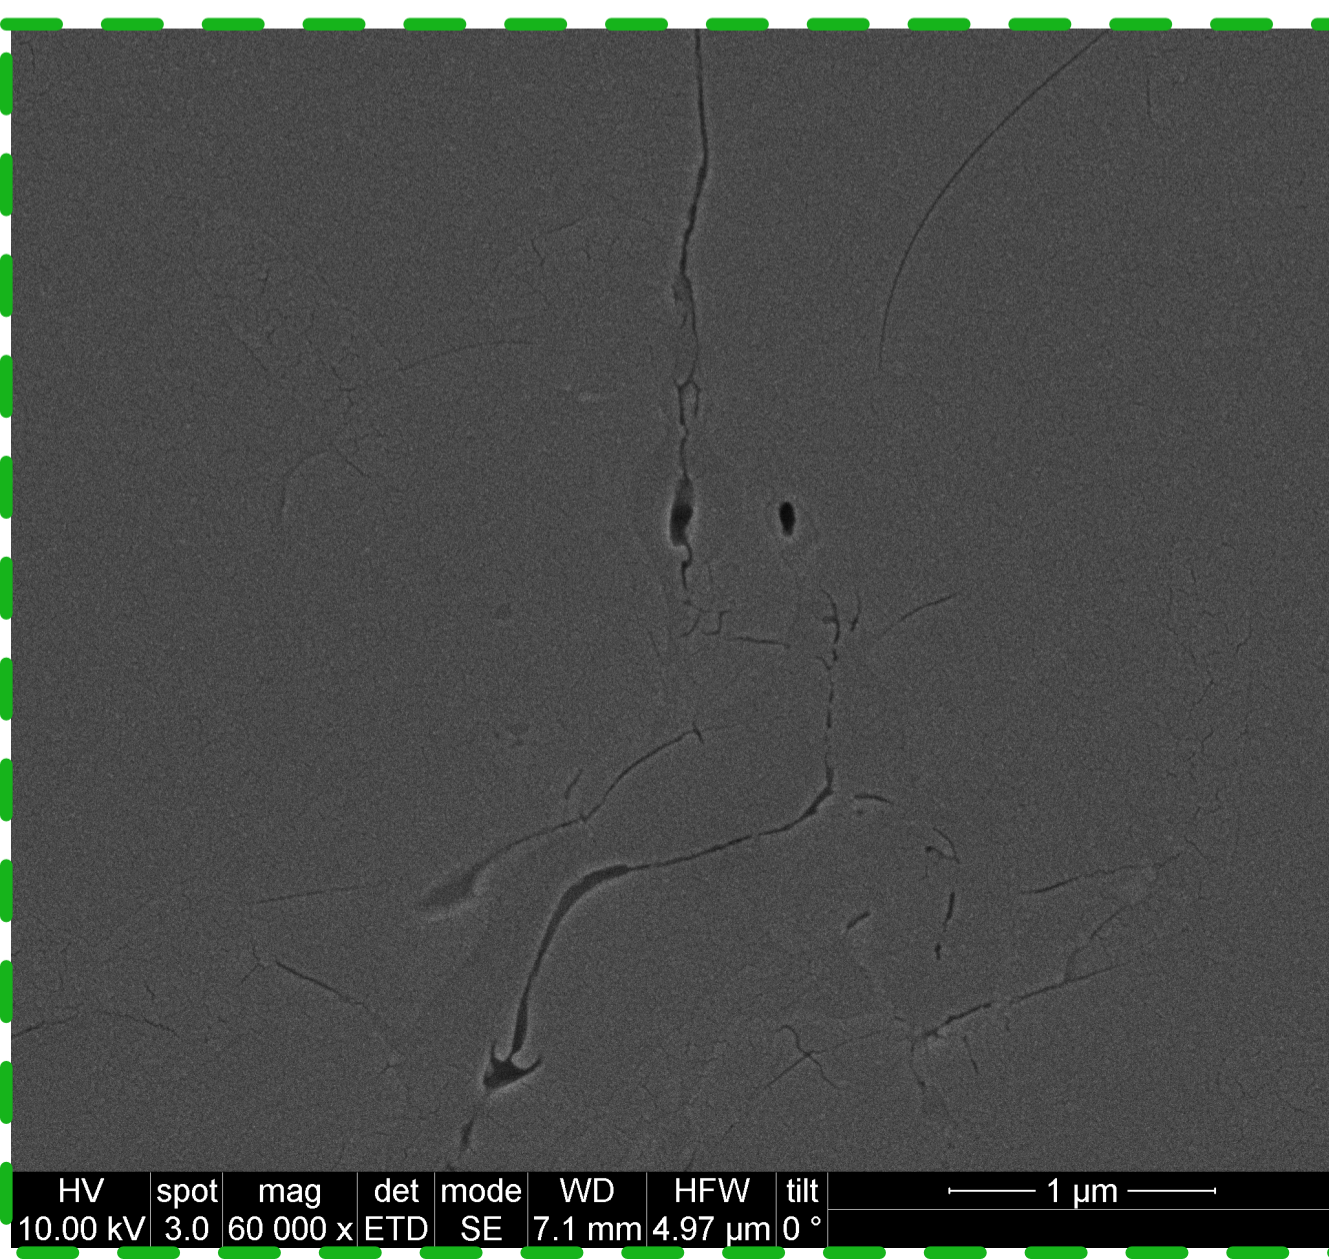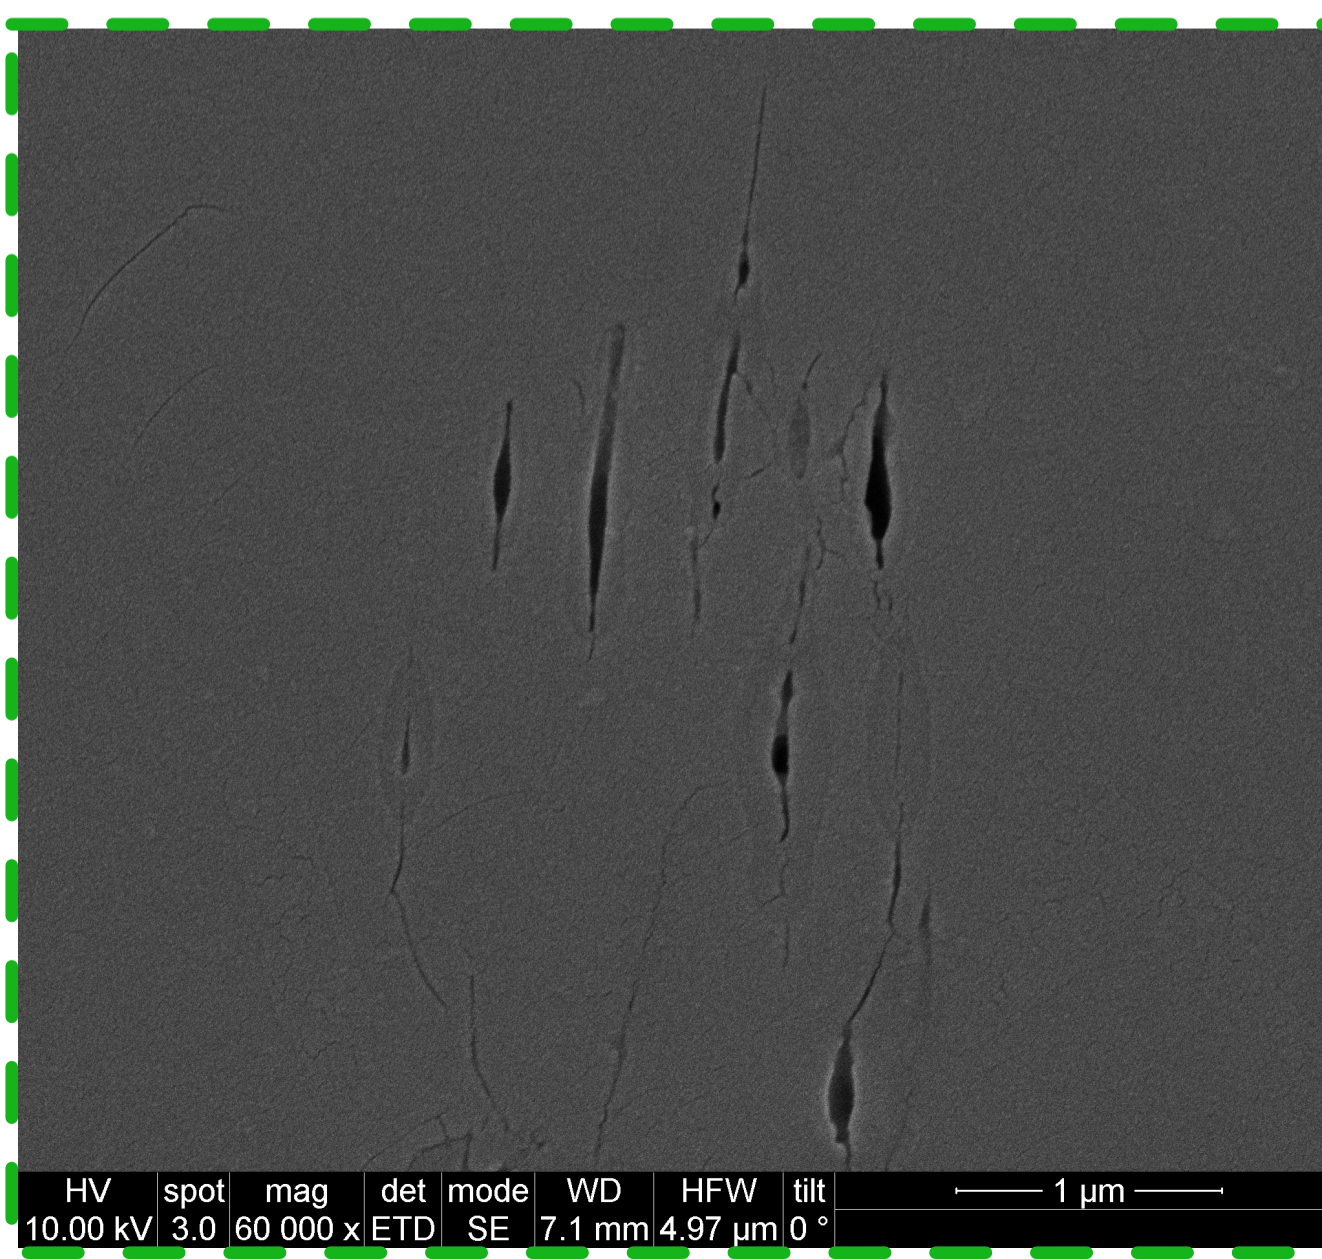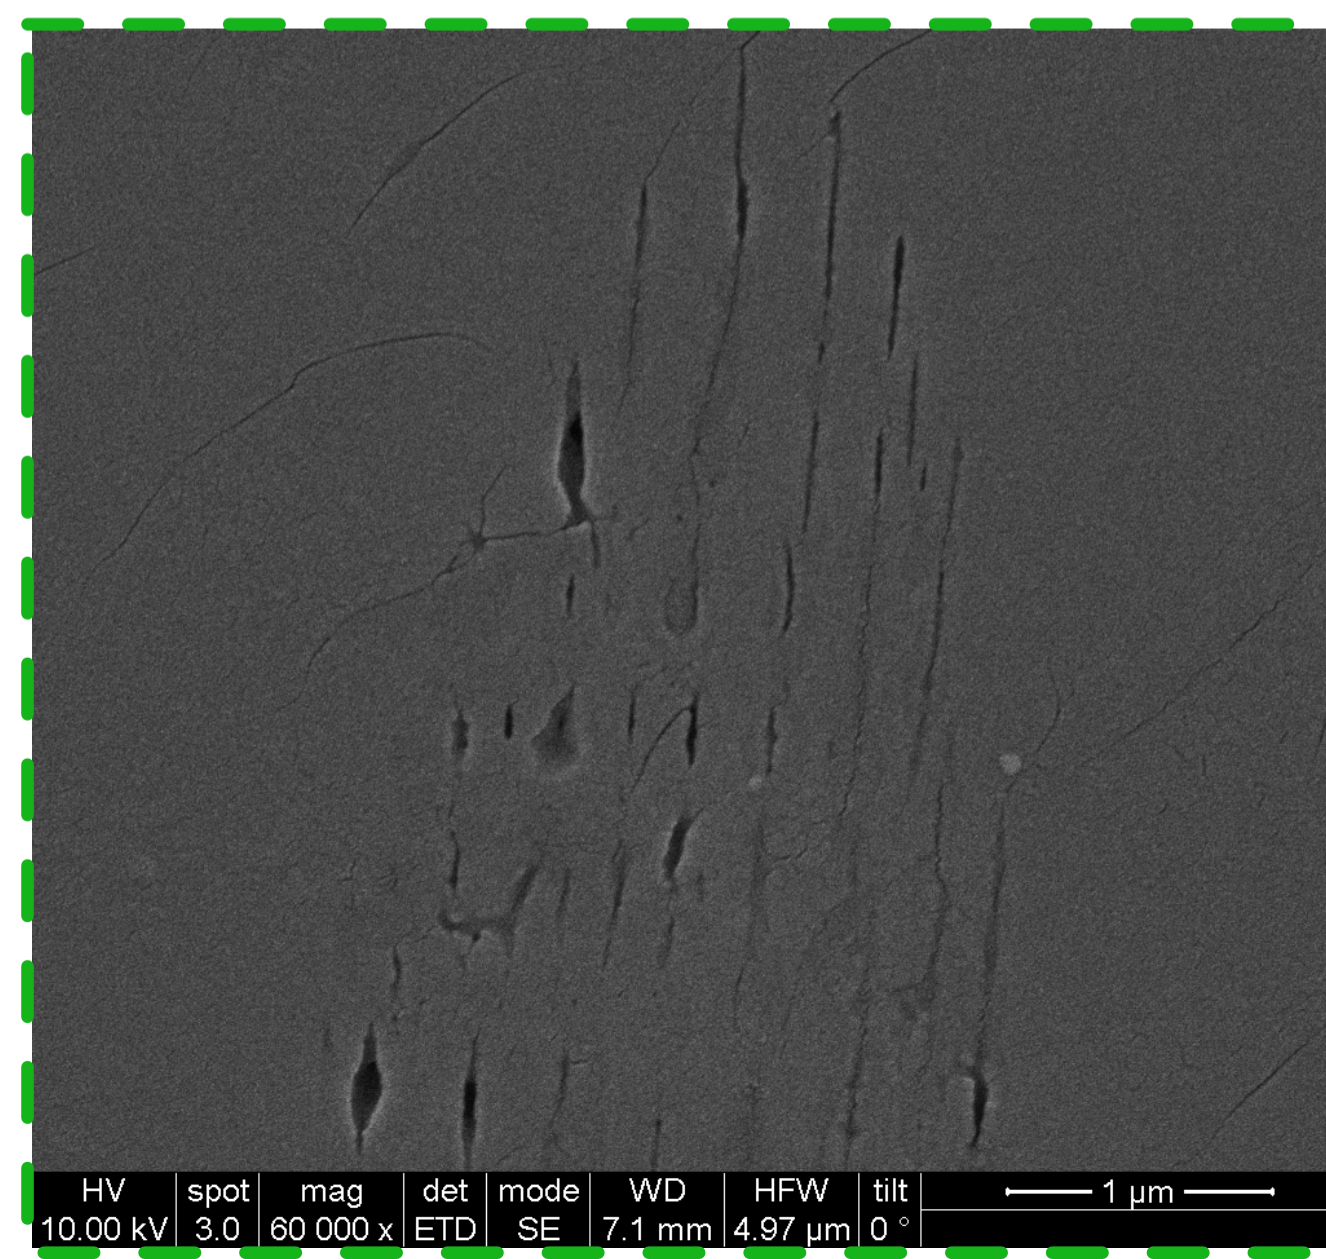

Supplement: d3lc00052d3.pdf [file d3lc00052d3.pdf]
